# Supplementary material for: A polypyrrole derived nitrogen doped porous carbon support for an atomically dispersed Mn electrocatalyst for the oxygen reduction reaction
Source: Royal Society of Chemistry journal article supplement (doi:10.1039/d3se00495c), 2023-01-01
Supplement: d3se00495c1.pdf [file d3se00495c1.pdf]

## Electronic Supplementary Information

### A polypyrrole derived nitrogen doped porous carbon support for atomically dispersed Mn electrocatalyst for oxygen reduction reaction

Sanjit Kumar Parida,<sup>\*a</sup> Tulasi Barik,<sup>b</sup> Hrudananda Jena<sup>\*a</sup>

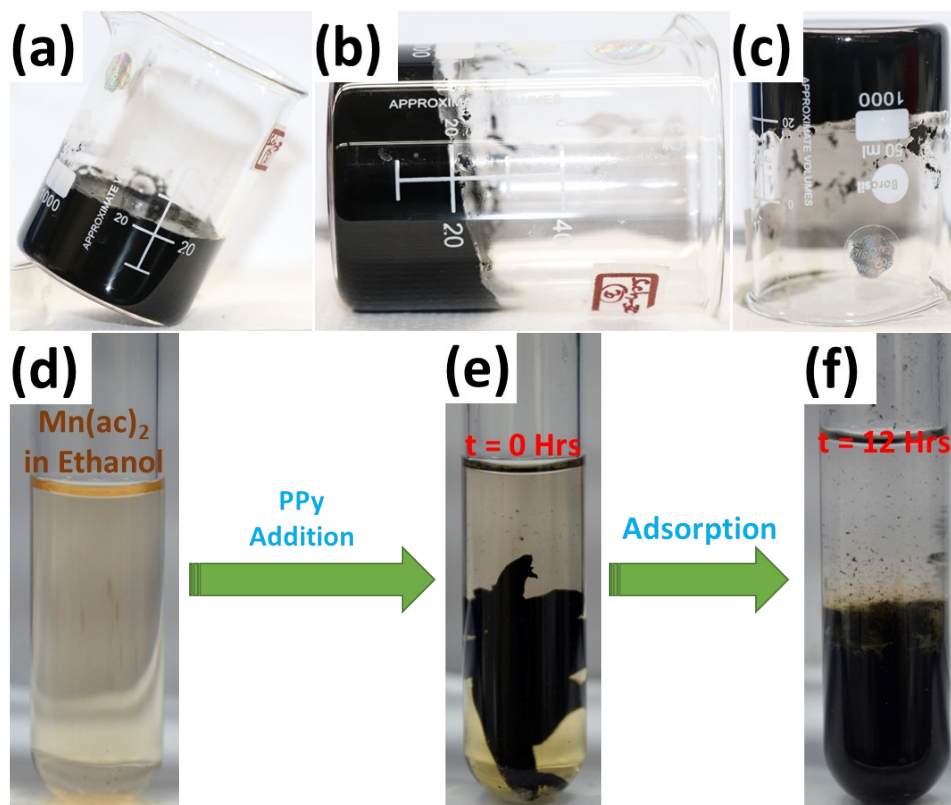

**Fig. S1** Photographs of PPy hydrogel (a)-(c) and Mn(ac)<sub>2</sub> loaded PPy at different time intervals (d)-(g).

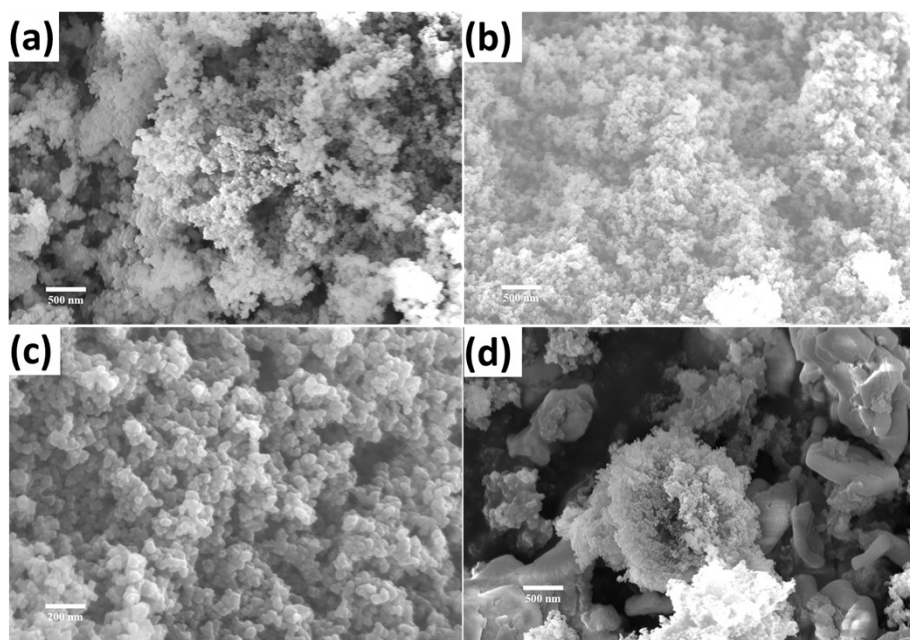

**Fig. S2** FESEM images of (a) 0Mn@PPy (b, c) 0.01Mn@PPy (d) 0.1Mn@PPy.

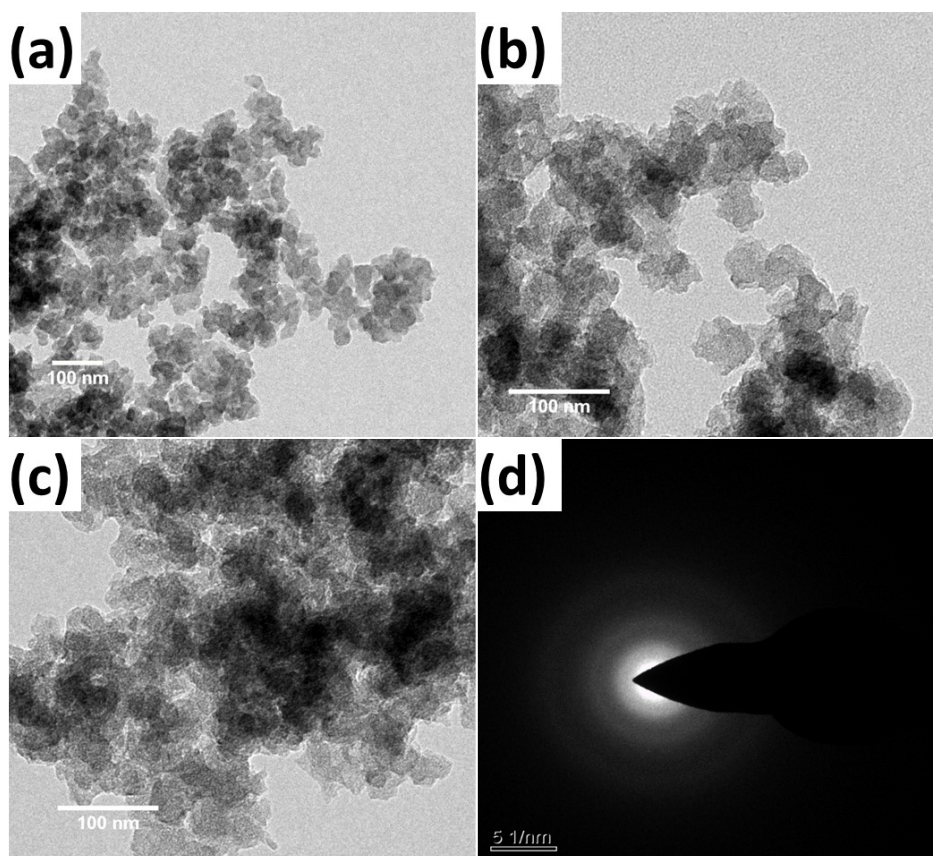

**Fig. S3** Representative TEM images of (a) 0Mn-N-C, (b) 0.01Mn-N-C, (c) 0.1Mn-N-C and (d) SAED pattern of 0.01Mn-N-C.

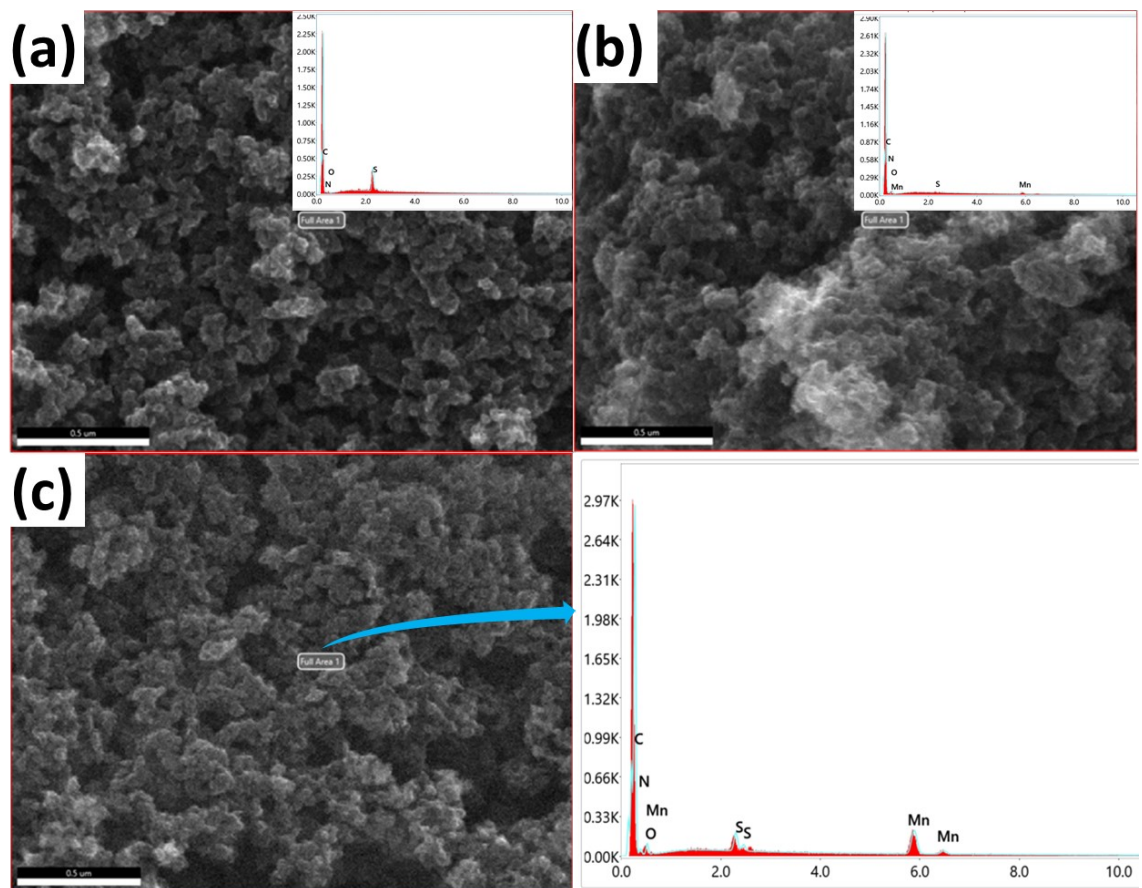

Fig. S4 SEM image with corresponding EDX pattern of (a) 0Mn-N-C, (b) 0.1Mn-N-C and (c) 0.01Mn-N-C.

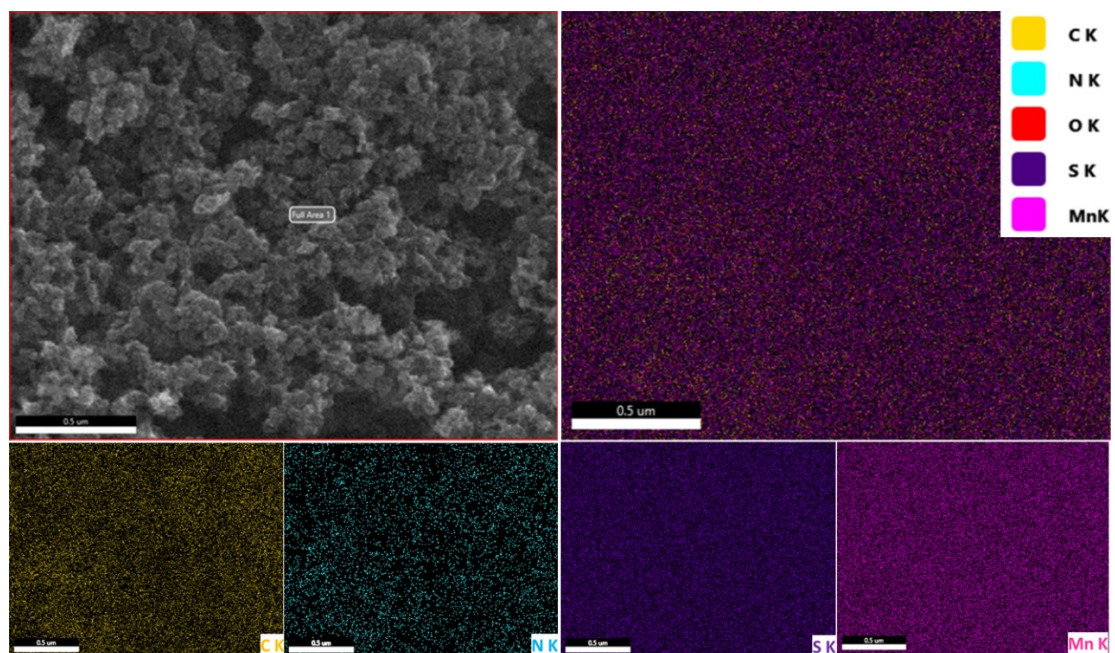

Fig. S5 SEM image with EDX elemental mapping of 0.01Mn-N-C.

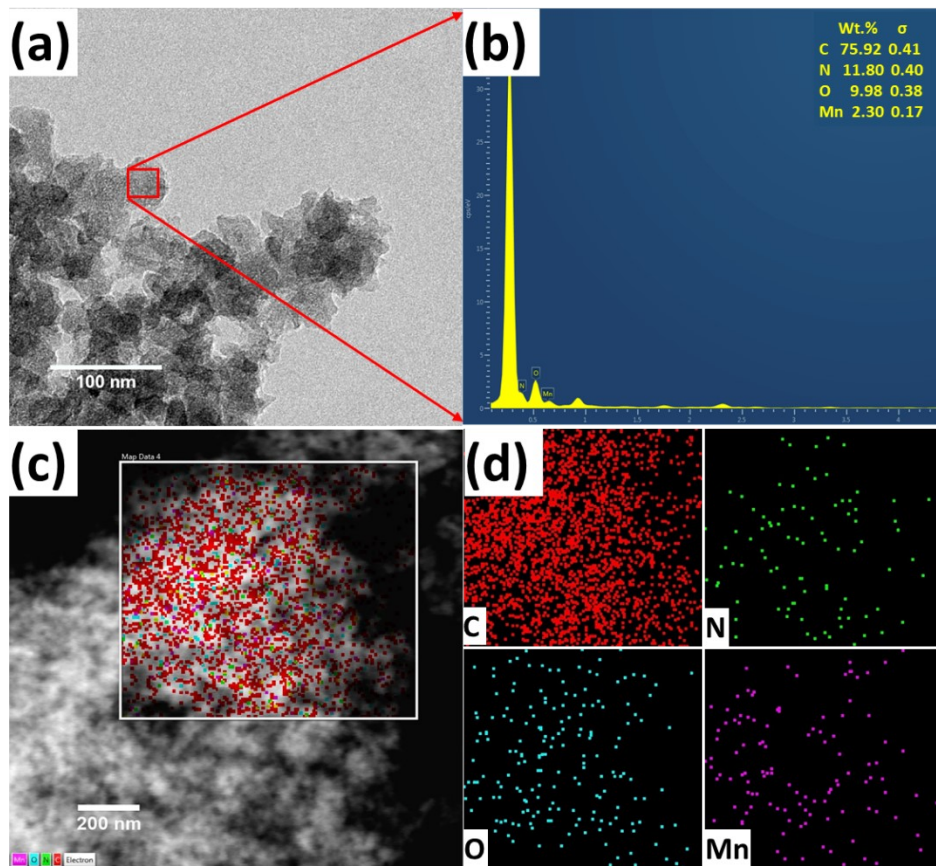

**Fig. S6** (a) STEM image, (b) EDS pattern and (c, d) EDX elemental mapping of 0.01Mn-N-C.

**Table S1. BET surface area and pore size of the catalysts.**

| Catalyst   | $SA_{BET}$ (m <sup>2</sup> /g) | $SA_{Micro}$ (m <sup>2</sup> /g) | $V_{Micro}$ (cc/g) | $V_{Meso}$ (cc/g) | $V_{Total}$ (cc/g) |
|------------|--------------------------------|----------------------------------|--------------------|-------------------|--------------------|
| 0Mn-N-C    | 411.485                        | 168.369                          | 0.073              | 0.390             | 1.487              |
| 0.01Mn-N-C | 492.621                        | 49.466                           | 0.024              | 0.432             | 1.590              |
| 0.1Mn-N-C  | 209.104                        | 11.023                           | 0.006              | 0.203             | 0.2639             |

**Table S2. Elemental composition of catalysts as obtained from XPS and ICP-OES.**

| Catalyst   | At. % Composition (XPS) |     |     |     |     | Wt.% (ICP-OES) |
|------------|-------------------------|-----|-----|-----|-----|----------------|
|            | C                       | N   | O   | S   | Mn  | Mn             |
| 0Mn-N-C    | 86.5                    | 9.1 | 3.5 | 0.9 | 0.0 | 0.00           |
| 0.01Mn-N-C | 80.2                    | 8.8 | 7.6 | 1.6 | 1.8 | 2.66           |
| 0.1Mn-N-C  | 86.3                    | 6.2 | 6.1 | 0.3 | 0.8 | 1.90           |

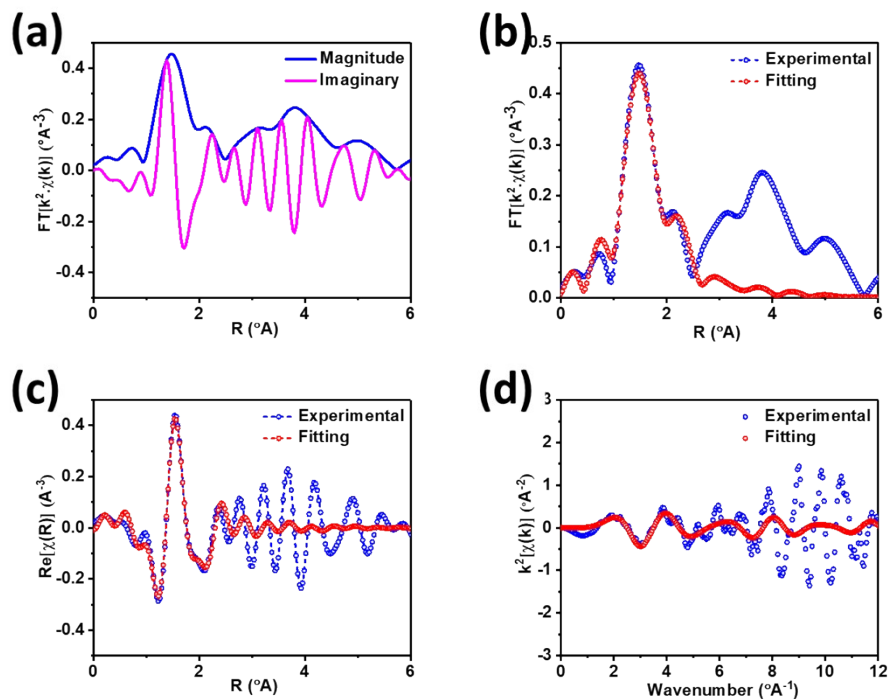

**Fig. S7** (a) The magnitude and imaginary part of the FT-EXAFS of 0.01Mn-N-C. The experimental and fitting curves of FT-EXAFS of 0.01Mn-N-C in (b, c) R-space and (d) k-space.

**Table S3. Fitting parameters of Mn K-edge EXAFS for 0.01Mn-N-C.**

| Path | N | R (°Å)      | $\sigma^2$    | $\Delta E_0$ (eV) | R-factor |
|------|---|-------------|---------------|-------------------|----------|
| Mn-N | 4 | 2.067±0.025 | 0.0009±0.0029 | 1.286±1.848       | 0.091    |

**N:** Coordination number; **R:** the distance between absorber and backscatter atoms (equals to the bond length of Mn-N);  **$\sigma^2$ :** the Debye-Waller factor value;  **$\Delta E_0$ :** the inner potential correction to account for the difference in the inner potential between the sample and the reference compound.

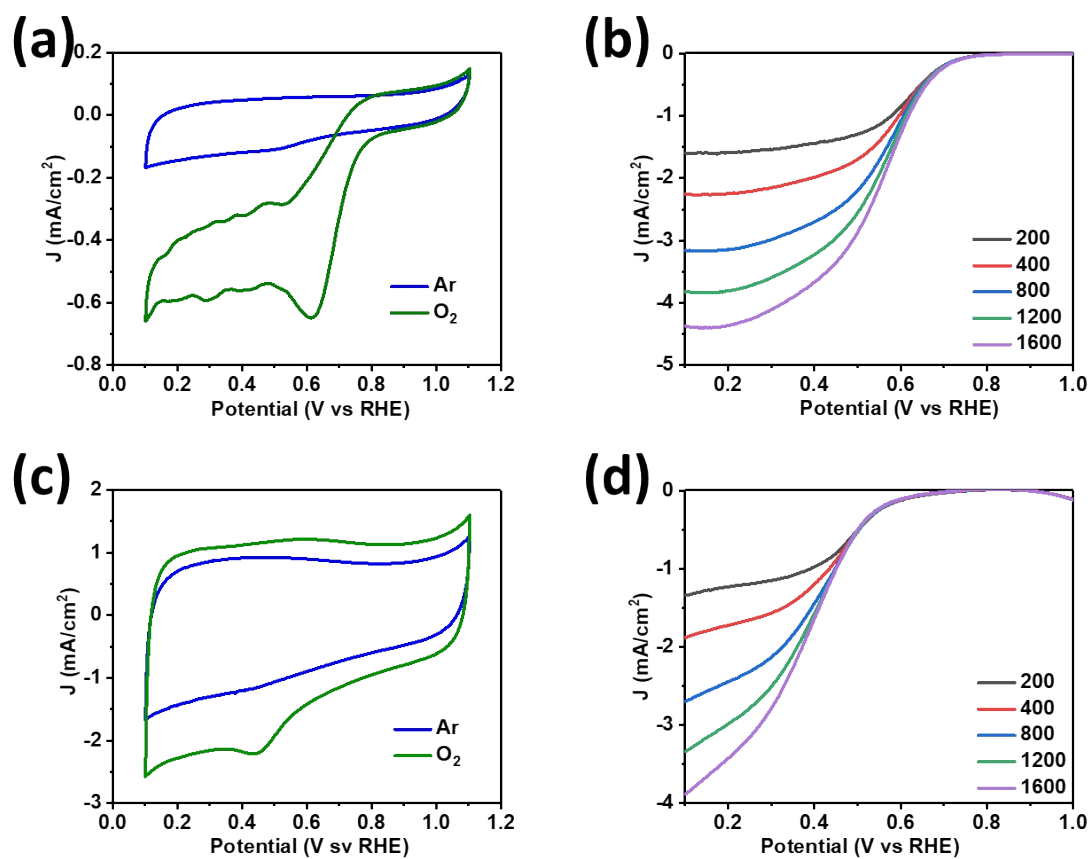

Fig. S8 (a) CV, (b) LSV of 0.01Mn-N-C and (c) CV, (d) LSV of 0Mn-N-C in 0.5M H<sub>2</sub>SO<sub>4</sub>.

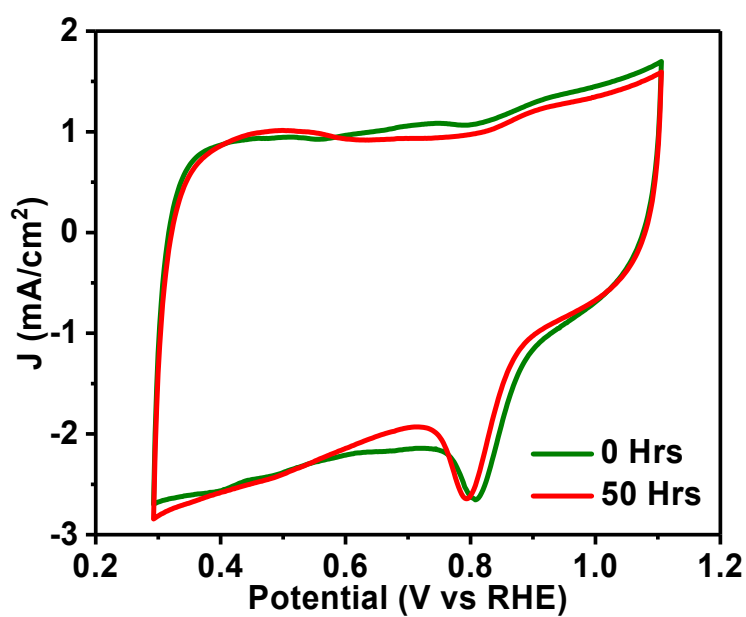

Fig. S9 CV of 0.01Mn-N-C after chronoamperometric test at 0.7V vs RHE at 1600 RPM in O<sub>2</sub> saturated 0.1M KOH.

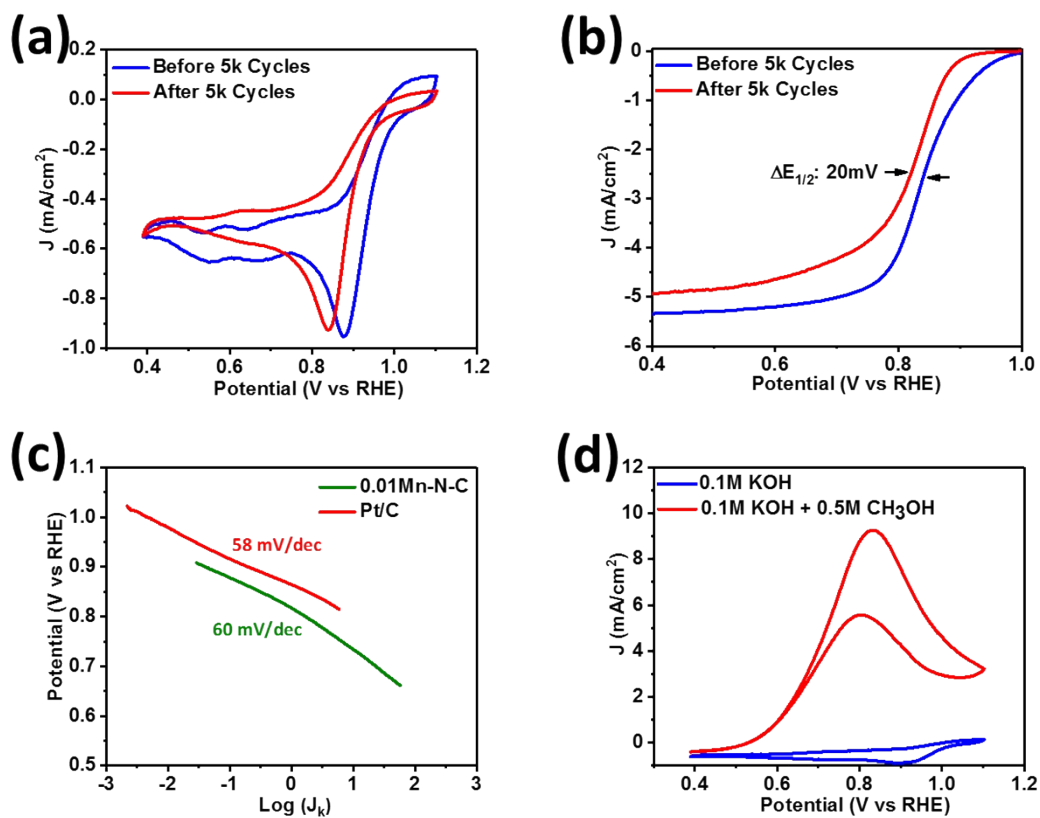

**Fig. S10** (a) CV and (b) LSV of Pt/C before and after accelerated durability test (ADT). (c) Tafel slopes of 0.01Mn-N-C and Pt/C after ADT. (d) CV of Pt/C in O<sub>2</sub> saturated 0.1M KOH and 0.1M KOH+0.5M CH<sub>3</sub>OH in methanol tolerance test.

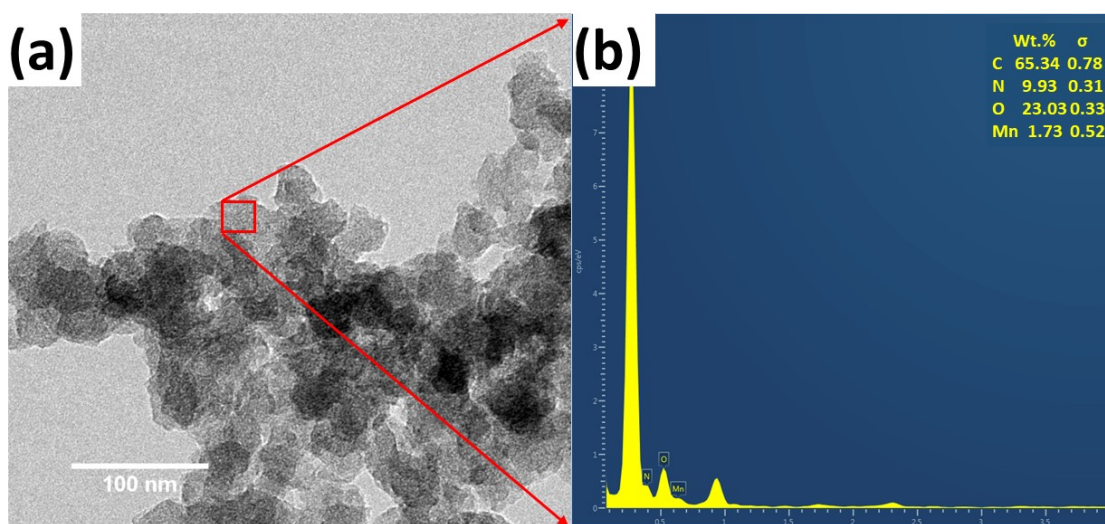

**Fig. S11** (a) STEM image and (b) corresponding EDX pattern of 0.01Mn-N-C after ADT.

**Table S3. Review of ORR activity of Mn single-atom catalysts in 0.1M KOH reported in recent literature.**

| Catalyst              | Mn Content      | Loading ( $\mu\text{g}/\text{cm}^2$ ) | $E_{\text{on}}$ (V vs RHE) | $E_{1/2}$ (V vs RHE) | Ref.             |
|-----------------------|-----------------|---------------------------------------|----------------------------|----------------------|------------------|
| <b>0.01Mn-N-C</b>     | <b>2.66 wt%</b> | <b>400</b>                            | <b>0.91</b>                | <b>0.82</b>          | <b>This work</b> |
| MnNC                  | 7.88 wt%        | 500                                   | 0.97                       | 0.86                 | [1]              |
| Mn-N-C-OAc-10-Second  | 0.36 at%        | 800                                   | -                          | 0.94                 | [2]              |
| Mn-NAHPC-900          | 0.76 wt%        | 263                                   | 0.96                       | 0.86                 | [3]              |
| Mn-SA                 | 1.8 wt%         | 200                                   | 0.99                       | 0.87                 | [4]              |
| Mn-N-C900             | 0.27 at%        | 600                                   | 0.98                       | 0.88                 | [5]              |
| MnSAC                 | 1.85 wt%        | 102                                   | 1.04                       | 0.915                | [6]              |
| MnN <sub>4</sub> @rGO | -               | 250                                   | 0.91                       | 0.86                 | [7]              |
| Mn@NG                 | 0.5 wt%         | 300                                   | 0.95                       | 0.82                 | [8]              |
| MnNPC-900             | 0.39 wt%        | 400                                   | 0.97                       | 0.84                 | [9]              |
| f-MnNC/CNT-170        | 0.67 at%        | 260                                   | 0.91                       | 0.83                 | [10]             |

**References:**

- [1] ACS Sustainable Chem. Eng. 2022, 10, 1, 224–233.
- [2] J. Mater. Chem. A, 2022, 10, 2826-2834.
- [3] Int. J. Hydrog. Energy 46 (1), 2021, 543-554.
- [4] ACS Sustainable Chem. Eng. 2020, 8, 427–434.
- [5] ACS Sustainable Chem. Eng. 2020, 8, 25, 9367–9376.
- [6] Nano Lett. 2020, 20, 5443-5450.
- [7] Inorg. Chem. Commun. 2020, 112, 107700.
- [8] Applied Catalysis B: Environmental 257 (2019) 117930.
- [9] Small 2019, 15, 1804524.
- [10] Nanoscale 2019, 11, 15900-15906.
